# Supplementary material for: The systematics of the Cervidae: a total evidence approach
Source: PeerJ journal article supplement (doi:10.7717/peerj.8114), 2020-02-18
Supplement: S1.pdf [file S1.pdf]

# Supplementary Information – Measurements

## The systematics of the Cervidae: a total evidence approach

Nicola S. Heckeberg<sup>1,2,3</sup>

<sup>1</sup>Department of Earth and Environmental Sciences, Palaeontology & Geobiology, Ludwig-Maximilians-Universität München, Munich, Germany

<sup>2</sup>SNSB – Bayerische Staatssammlung für Paläontologie und Geologie, Munich, Germany

<sup>3</sup>Current address: Museum für Naturkunde, Leibniz Institute for Evolution and Biodiversity Science, Berlin, Germany

Table 1: List of measurements taken on the mandible including the dentition. Abbreviations correspond to those in Figures 1.

| <b>Abbr.</b> | <b>Measuring distances - Mandibula</b>                                                                                  |
|--------------|-------------------------------------------------------------------------------------------------------------------------|
| pxL          | Length of lower premolar                                                                                                |
| WAB          | Total width of lower antepremolar tooth arch at base                                                                    |
| WAT          | Total width of lower antepremolar tooth arch at tips                                                                    |
| TLL          | Total length of lower premolars & molars                                                                                |
| LLP          | Length of lower premolars                                                                                               |
| LLM          | Length of lower molars                                                                                                  |
| LSY          | Length of symphysis                                                                                                     |
| TLM          | Total length of mandibula                                                                                               |
| HRM          | Height of ramus mandibulae                                                                                              |
| DCC          | Distance: dorsal end of processus coronoideus - processus condylaris                                                    |
| LIM          | Length of incisura mandibulae (parallel to tooth row at level of ventral rim of articulation surface of pr. condylaris) |
| LMD          | Length of diastema                                                                                                      |
| LCO          | Length of processus coronoideus (at level of articular surface of pr. condylaris)                                       |

Table 2: List of measurements taken on the cranium including the dentition. Abbreviations correspond to those in Figures 2 and 3.

| <b>Abbr.</b> | <b>Measuring distances - Cranium</b>                           |
|--------------|----------------------------------------------------------------|
| PxL          | Length of upper premolar                                       |
| LUP          | Length of upper premolars                                      |
| LUM          | Length of upper molars                                         |
| ICD          | Distance between cristae on diastema on maxilla (smallest)     |
| WMX          | Width of maxilla at diastema                                   |
| TLP          | Total length of palate                                         |
| TWP          | Total width of palate between tooth rows                       |
| IPF          | Distance between foramina palatina                             |
| TLS          | Total length skull (ventral)                                   |
| LBU          | Length of bulla                                                |
| WBU          | Width of bulla                                                 |
| WBC          | Width of braincase (widest)                                    |
| NFM          | Distance: crista nuchae - dorsal rim foramen magnum            |
| NBO          | Distance: crista nuchae - ventral end of basioccipital         |
| OPX          | Distance: anterior rim of orbita - anterior end of praemaxilla |
| LOR          | Length of orbita                                               |
| HOR          | Height of orbita                                               |
| LPV          | Length of praeorbital vacuity                                  |
| WPV          | Width of praeorbital vacuity                                   |
| LNA          | Length of nasal (along midline)                                |
| TWS          | Total width of skull (usually at zygomatic arch/orbita)        |
| LLA          | Length of lacrimal (facial portion)                            |
| HLA          | Height of lacrimal (facial portion)                            |
| LPM          | Medial length of pedicle                                       |
| LPL          | Lateral length of pedicle                                      |
| PAP          | Pedicle diameter anterior - posterior                          |
| PML          | Pedicle diameter medial - lateral                              |
| LAN          | Length of antler (main beam)                                   |

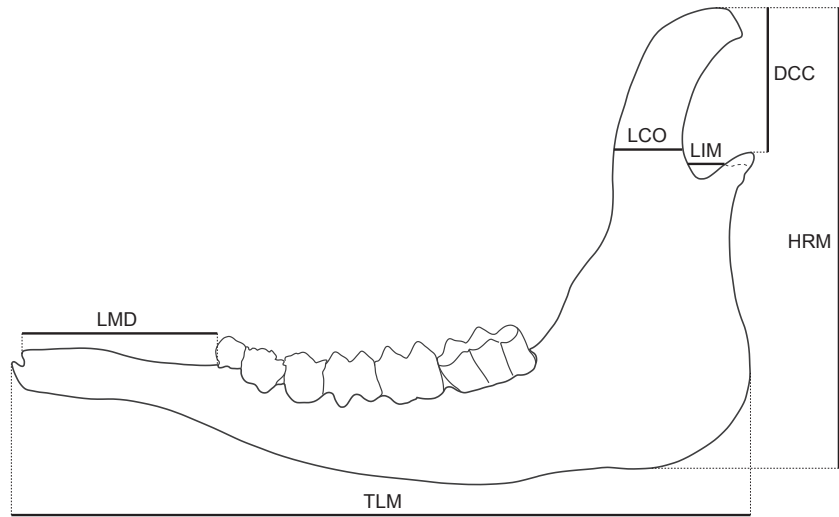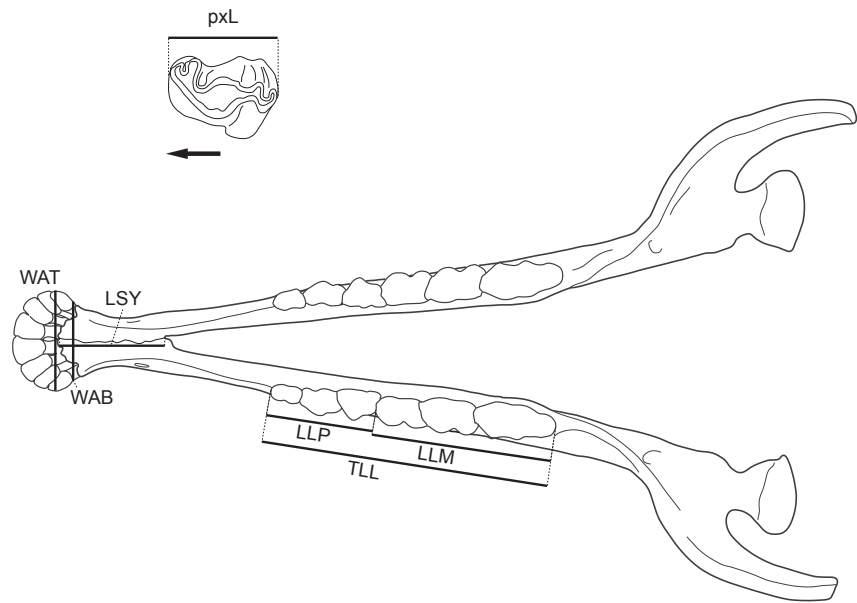

Figure 1: All measuring distances of the mandible in lateral and dorsal view and of the lower premolar. (Drawing by Nicola Heckeberg)

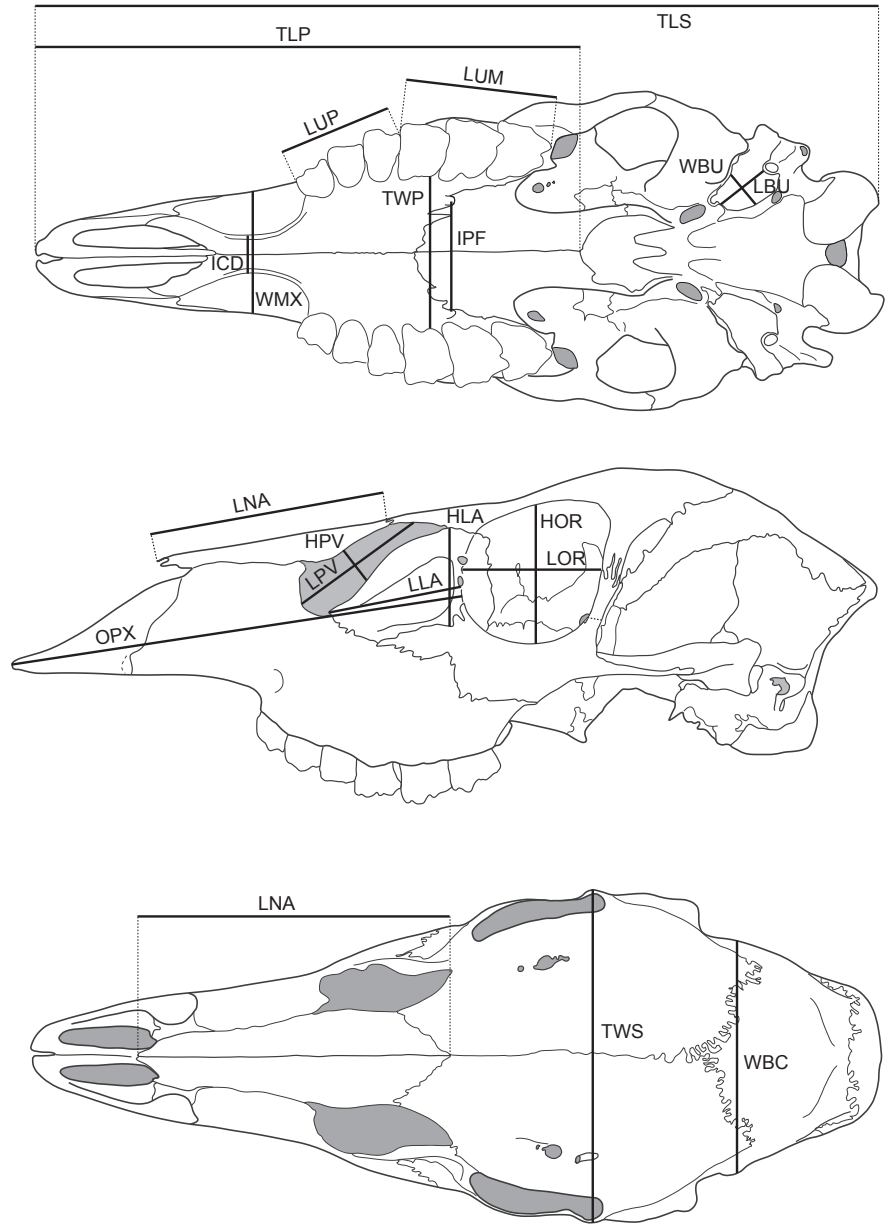

Figure 2: All measuring distances of the skull in ventral, lateral and dorsal view.  
 (Drawing by Nicola Heckeberg)

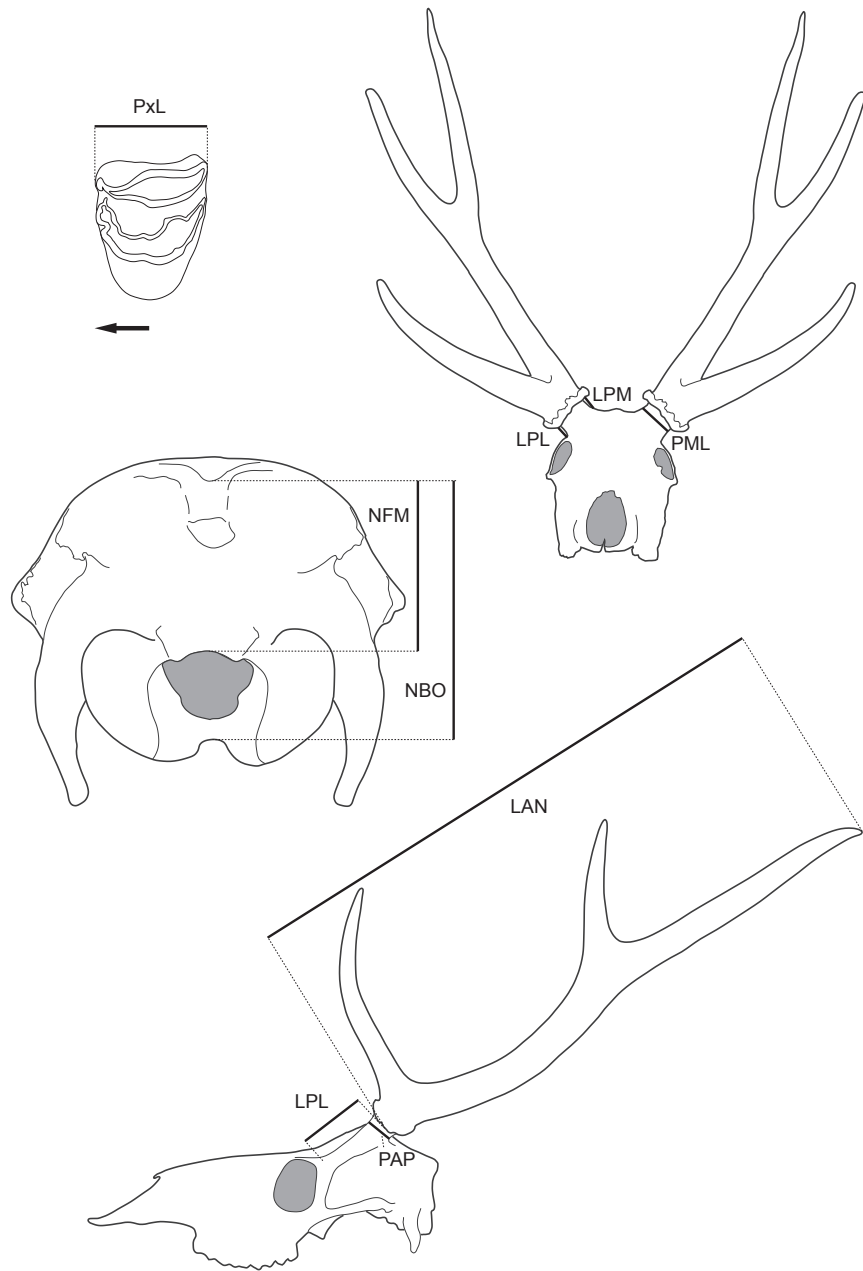

Figure 3: All measuring distances of the skull in occipital view, of the upper premolar, and of antlers and pedicles. (Drawing by Nicola Heckeberg)
