# Supplementary material for: The systematics of the Cervidae: a total evidence approach
Source: PeerJ journal article supplement (doi:10.7717/peerj.8114), 2020-02-18
Supplement: S2.pdf [file S2.pdf]

# Supplementary Information – Parameters of Phylogenetic Analyses

## The systematics of the Cervidae: a total evidence approach

Nicola S. Heckeberg<sup>1,2,3</sup>

<sup>1</sup>Department of Earth and Environmental Sciences, Palaeontology & Geobiology, Ludwig-Maximilians-Universität München, Munich, Germany

<sup>2</sup>SNSB – Bayerische Staatssammlung für Paläontologie und Geologie, Munich, Germany

<sup>3</sup>Current address: Museum für Naturkunde, Leibniz Institute for Evolution and Biodiversity Science, Berlin, Germany

Table 1: Overview of all analyses undertaken mainly based on the morphological character matrix. Dent=Dental, Cran=Cranial, UnO=unordered, O=ordered, N=No, Y=Yes; Opt. Crit.=Optimality Criterion, CI=consistency index, HI=homoplasy index, RI=retention index, RC=rescaled consistency index, E=Extant, F=Fossil.

| Analysis ID  | Opt. Crit. | Data Set | Charac-<br>ters | Taxa | Ordered | CI     | HI     | RI     | RC     | Tree Length |
|--------------|------------|----------|-----------------|------|---------|--------|--------|--------|--------|-------------|
| Dent_UnO_FE  | MP         | dental   | 79              | 78   | N       | 0.2559 | 0.9006 | 0.4786 | 0.1225 | 1016        |
| Dent_O_FE    | MP         | dental   | 79              | 78   | Y       | 0.1848 | 0.9285 | 0.2116 | 0.0391 | 1412        |
| Dent_O_E     | MP         | dental   | 79              | 47   | Y       | 0.2567 | 0.8850 | 0.2982 | 0.0766 | 861         |
| Dent_O_F     | MP         | dental   | 79              | 31   | Y       | 0.3520 | 0.7458 | 0.4036 | 0.1420 | 358         |
| Dent_MB_UnO  | BI         | dental   | 79              | 78   | N       | -      | -      | -      | -      | -           |
| Dent_MB_O    | BI         | dental   | 79              | 78   | Y       | -      | -      | -      | -      | -           |
| Dent_MB_ML   | ML         | dental   | 79              | 78   | N       | -      | -      | -      | -      | -           |
| Cran_UnO_FE  | MP         | cranial  | 89              | 78   | N       | -      | -      | -      | -      | -           |
| Cran_O_FE    | MP         | cranial  | 89              | 78   | Y       | -      | -      | -      | -      | -           |
| Cran_O_E     | MP         | cranial  | 89              | 47   | Y       | 0.2186 | 0.8357 | 0.4329 | 0.0946 | 773         |
| Cran_O_F     | MP         | cranial  | 89              | 31   | Y       | -      | -      | -      | -      | -           |
| Cran_MB_UnO  | BI         | cranial  | 89              | 78   | N       | -      | -      | -      | -      | -           |
| Cran_MB_O    | BI         | cranial  | 89              | 78   | Y       | -      | -      | -      | -      | -           |
| Cran_MB_ML   | ML         | cranial  | 89              | 78   | N       | -      | -      | -      | -      | -           |
| Combi_UnO_FE | MP         | combined | 168             | 78   | N       | 0.2216 | 0.8825 | 0.4312 | 0.0956 | 2017        |
| Combi_O_FE   | MP         | combined | 168             | 78   | Y       | 0.1597 | 0.9155 | 0.1653 | 0.0264 | 2806        |
| Combi_O_E    | MP         | combined | 168             | 47   | Y       | 0.2583 | 0.8503 | 0.4335 | 0.1120 | 1510        |
| Combi_O_F    | MP         | combined | 168             | 31   | Y       | 0.3238 | 0.7350 | 0.1556 | 0.0504 | 698         |
| Combi_MB_UnO | BI         | combined | 168             | 78   | N       | -      | -      | -      | -      | -           |
| Combi_MB_O   | BI         | combined | 168             | 78   | Y       | -      | -      | -      | -      | -           |
| Combi_MB_ML  | ML         | combined | 168             | 78   | N       | -      | -      | -      | -      | -           |

Table 2: Results from the Stepping Stone Sampling analyses. Values represent mean Bayes Factors calculated from the mean of the sum of the marginal likelihoods of the two runs of each analysis.

|                | Unpart<br>Unord<br>Gam | PartMin    | PartMax    | UnPart<br>NoGam | UnPartOrd |
|----------------|------------------------|------------|------------|-----------------|-----------|
| UnpartUnordGam | —                      | -18,792119 | -22,391951 | -69,252349      | 4,000185  |
| PartMin        | 18,792119              | —          | -3,599831  | —               | —         |
| PartMax        | 22,391951              | 3,599831   | —          | —               | —         |
| UnPartNoGam    | 69,252349              | —          | —          | —               | —         |
| UnPartOrd      | -4,000185              | —          | —          | —               | —         |

Table 3: Statistical data for all molecular markers

| Gene                                   | Abbr.        | Total Length | Excluded                        | Final Length | Coding | in-up | out-up | Identical sites* | Pair-wise Identity | Un-gapped lengths <sup>†</sup> | GC                     | A               | C               | G              | T               | Other                                | Gaps [-]       |
|----------------------------------------|--------------|--------------|---------------------------------|--------------|--------|-------|--------|------------------|--------------------|--------------------------------|------------------------|-----------------|-----------------|----------------|-----------------|--------------------------------------|----------------|
| kappa-casein                           | <i>Csn</i>   | 714          | 1-349                           | 369          | Y      | 20    | 13     | 7                | 283 (71.3%)        | 93.4%                          | 312.0 ±90.4; 156;      | 2,864 (45.9%)   | 1,837 (29.4%)   | 1,027 (16.5%)  | 1,466 (23.5%)   | Y:1                                  | 0 (0.0%)       |
| alpha-lactalbumin                      | <i>Lalba</i> | 525          | 1-16, 227-235, 389-404, 505-525 | 465          | N      | 25    | 19     | 6                | 282 (60.6%)        | 93.1%                          | 369 ±38.5; 269;        | 4,528 (40.2%)   | 2,271 (20.5%)   | 2,257 (20.4%)  | 3,722 (33.6%)   | Y:1                                  | 195 (1.7%)     |
| protein kinase C <i>lota</i>           | <i>Prkci</i> | 578          | 1-28, 169-183, 292-306, 570-578 | 513          | N      | 29    | 23     | 6                | 348 (67.8%)        | 95.8%                          | 464 ±19.6; 415;        | 4,014 (27.4%)   | 1,677 (11.6%)   | 2,337 (16.2%)  | 5,596 (38.7%)   | Y:4; W:3; R:2                        | 189 (1.3%)     |
| prion protein                          | <i>Prnp</i>  | 863          | 1-37, 254-277, 351-353, 831-863 | 768          | Y      | 21    | 15     | 6                | 631 (82.2%)        | 97.2%                          | 509 ±37.3; 315;        | 8,556 (54.9%)   | 3,868 (24.8%)   | 4,688 (30.1%)  | 3,073 (19.7%)   | Y:11; W:2; S:1; R:6; M:1             | 0 (0.0%)       |
| sex determining region on y-chromosome | <i>Sry</i>   | 690          | -                               | 690          | Y      | 70    | 66     | 4                | 510 (73.9%)        | 97.2%                          | 768 ±90.7; 146;        | 20,849 (47.3%)  | 10,677 (24.2%)  | 10,172 (23.1%) | 9,193 (20.9%)   | -                                    | 18 (0.0%)      |
| mitochondrial genome                   | mtG          | 14904        | -                               | 14904        | Y      | 46    | 39     | 7                | 8,748 (58.8%)      | 88.9%                          | 690 ±2.2; 14861; 14878 | 259,297 (37.8%) | 167,043 (24.4%) | 92,254 (13.5%) | 198,332 (29.0%) | Y:9; S:2; R:5; N:1; M:2; K:2         | 1,627 (0.2%)   |
| cytochrome b                           | <i>Cytb</i>  | 1140         | -                               | 1140         | Y      | 130   | 124    | 6                | 583 (51.1%)        | 87.9%                          | na                     | 52,573 (35.5%)  | 35,444 (27.9%)  | 17,129 (11.6%) | 39,088 (26.4%)  | Y:52; W:15; S:3; K:22; M:5; K:2; D:1 | 15,099 (10.2%) |

**Notes.** \*positions refer to final length sequence; <sup>†</sup>values are provided as [mean ±Stdv; min; max]; columns ‘GC’ to ‘T’ and ‘Gaps’: Frequency (%) of non-gaps
