# Supplementary material for: The systematics of the Cervidae: a total evidence approach
Source: PeerJ. 2020 Feb 18;8:e8114. doi: 10.7717/peerj.8114 (PMC7034380; doi:10.7717/peerj.8114)
Supplement: Supplemental Information 3 [file peerj-08-8114-s003.xlsx]

## Sheet: Sheet1
Supplementary Information – Heckeberg (2019) – The systematics of the Cervidae: a total evidence approach
Accession Numbers
Species	cytochrome b	mt genome	csn	Lalba	Prkci	Prnp	Sry
Alces alces	AJ000026	JN632595	AJ532906	DQ379360	DQ379338	AY639095 (alces) DQ154297 (gigas) AY225484 (shirasi)	DQ888680 AY148965 (cameloides)
Alces americanus	M98484	–	–	–	–	–	–
Axis axis	AY607040	JN632599	–	DQ379348	DQ379329	–	DQ888681
Axis kuhlii	HQ893538	–	–	–	–	–	–
Axis porcinus	DQ379301	JN632600	–	DQ379349	DQ379367	–	AY244496
Blastocerus dichotomus	JN632603 AY607038 NC_020682	JN632603	–	DQ379361	DQ379341	–	–
Capreolus capreolus	AJ000024	JN632610	AJ532907	–	–	AY769955	DQ888700
Capreolus pygargus	AJ000025	–	–	–	–	–	EF100131
Cervus albirostris	AY044863 AF423202	JN632690	–	DQ379350	DQ379330	–	AY244498
Cervus canadensis	AF423198 EF139147	–	–	–	–	EU032293	EF100135 EF100134
Cervus elaphus	JF489133	NC_007704	U37504 U37505	–	AY846793	EU032281 FJ590751 (nelsoni) FJ436715 (scoticus)	[22] see .nex file
Cervus nippon	JF893484	NC_006993	D14379	DQ379352	DQ379332	AY679696	AB046700 AB247628 (yakushimae) AB247627 (yesoensis)
Dama dama	AJ000022	JN632629	–	DQ379356	DQ379335	AY286007	DQ888701
Dama mesopotamica	AY607034	JN632630	–	DQ379357	DQ379336	–	–
Elaphodus cephalophus	NC_008749	NC_008749	–	DQ379359	DQ379339	–	AF461765
Elaphurus davidianus	AF423194	JN632632	U37506	DQ379358	DQ379337	–	AY244501
Hippocamelus antisensis 1	JN632646 NC_020711	JN632646	–	DQ379362	DQ379342	–	–
Hippocamelus antisensis 2	DQ379307 GU190862
Hippocamelus bisulcus	DQ789177 DQ789178 GU190863	–	–	–	–	–	–
Hydropotes inermis	AJ000028	JN632649	–	–	DQ379340	EF192237	EF100132
Mazama americana 1	DQ789209 DQ789217	JN632656	U37362	DQ379363	DQ379343	–	–
Mazama americana 2	JN632657
Mazama americana 3	DQ789221 JN632656 NC_020719
Mazama americana 4	DQ789201 DQ789204
Mazama americana 5	DQ789219
Mazama bororo	DQ789187 DQ789231 DQ789228	–	–	–	–	–	–
Mazama bricenii	LT546656 LT546657 LT546658	–	–	–	–	–	–
Mazama chunyi	LT546655	–	–	–	–	–	–
Mazama gouazoubira 1	JN632658 NC_020720	JN632658	–	DQ379364	DQ379344	–	–
Mazama gouazoubira 2	DQ379308
Mazama nana	DQ789210 DQ789214 DQ789227	–	–	–	–	–	–
Mazama nemorivaga 1	JN632660	JN632660	–	–	–	–	–
Mazama nemorivaga 2	DQ789205 DQ789206 DQ789226 JN632659 NC_024812
Mazama pandora	KC146954 KC146955	–	–	–	–	–	–
Mazama rufina	JN632661 NC_020721	JN632661	–	–	–	–	–
Mazama temama	KC146956 KC146957 KC146958 KC146959	–	–	–	–	–	–
†Megaloceros giganteus	AM182644 AM182645	–	–	–	–	–	–
Muntiacus atherodes	LT546659	–	–	–	–	–	–
Muntiacus crinifrons	NC_004577 AY239042 DQ445734 DQ445732 DQ445735 DQ445733	NC_004577	–	–	–	–	AF461766
Muntiacus feae	AF042721	–	–	–	–	–	–
Muntiacus muntjak 1	NC_004563 AY225986	NC_004563	–	–	–	AF113944	AY007301
Muntiacus muntjak 2	AF042718
Muntiacus putaoensis	EF523665 EF523666 EF523667 EF523668 EF523669	–	–	–	–	–	–
Muntiacus reevesi	AF527537 NC_004069	NC_008491	AF165680	–	AF165677	–	AF461767
Muntiacus rooseveltorum	KJ425278 KJ425279 KJ425281 KJ425282	–	–	–	–	–	–
Muntiacus truongsonensis 1	KJ425277	–	–	–	–	–	–
Muntiacus truongsonensis 2	KJ425276
Muntiacus vuquangensis	FJ705435 AF042720 NC_016920	FJ705435	–	–	–	–	–
Odocoileus hemionus 1	HM222707	JN632670	AF165688	–	AF165685	AY330343	[20] see .nex file
Odocoileus hemionus 2	FJ188783 FJ188870
Odocoileus virginianus 1	DQ379370	JN632671	U37279	DQ379365	DQ379346	AY360089	DQ888702
Odocoileus virginianus 2	M98491
Ozotoceros bezoarticus	DQ789190 DQ789193 DQ789195 DQ789199	JN632681	–	–	–	–	–
Pudu mephistophiles	JN632691 LT546651 LT546652 LT546653 LT546654	–	–	–	–	–	–
Pudu puda	JN632692 AY607039 NC_020740	JN632692	–	DQ379366	DQ379347	–	–
Rangifer tarandus	AB245426 AY726704 KM506758	NC_007703	AF165696	–	AF165693	EU032303	AB247629
Rucervus duvaucelii	AY607041	JN632696	U37507	DQ379351	DQ379331	–	–
Rucervus eldii	AY157735	JN632697	–	DQ379353	–	–	DQ888697
Rucervus schomburgki	AY607036	–	–	–	–	–	–
Rusa alfredi	JN632698 NC_020744	JN632698	–	–	–	–	–
Rusa marianna	LT546647 LT546648 LT546649 LT546650	–	–	–	–	–	–
Rusa timorensis	AF423200	JN632699	–	DQ379354	DQ379333	–	DQ888698
Rusa unicolor	FJ556575	NC_008414	U37508	DQ379355	DQ379334	–	DQ888699
Antilocapra americana	JN632597	JN632597	AF165672	AY122014	AF165669	AF156187	–
Boselaphus tragocamelus	EF536350	EF536350	AF030331	AY122024	AF165725	AY720699	–
Hyemoschus aquaticus	JN632650	JN632650	–	–	–	–	–
Moschus moschiferus	FJ469675	JN632662	AY121997	AY122033	–	–	–
Okapia johnstoni	JN632674	JN632674	–	–	AF165709	–	–
Tragelaphus scriptus	AF022067	JN632706	–	–	AY667176	–	–
Tragelaphus imberbis	–	–	AF030330	AY122025	–	AY720703	–
Giraffa camelopardalis	–	–	AF165704	AY122015	AF165701	AF113942	–
Tragulus javanicus	–	–	D14381	AY122013	–	–	D13463
Tragulus meminna	–	–	–	–	AF165661	–	–
Moschus chrysogaster	–	–	–	–	–	AY723286	AY357219
Sus scrofa	–	–	–	–	–	NM_001008687	–
Moschus berezovskii	–	–	–	–	–	–	AY357218
Bos taurus	–	–	–	–	–	–	Z30327
