# Supplementary material for: The systematics of the Cervidae: a total evidence approach
Source: PeerJ. 2020 Feb 18;8:e8114. doi: 10.7717/peerj.8114 (PMC7034380; doi:10.7717/peerj.8114)
Supplement: Supplemental Information 6 [file peerj-08-8114-s006.txt]

[Supplementary Information Heckeberg (2019) – The systematics of the Cervidae: a total evidence approach – PeerJ]

Cranial Characters

  1. Mandibula - Ratio: Length of incisura mandibulae (=distance between processus coronoideus & processus condylaris) TO length of processus coronoideus </= 0.40 (0); > 0.40 (1).
  2. Mandibula - Length of diastema compared to the lower cheek tooth row <50 % (0); 51-75 % (1); >75 % (2).
  3. Mandibula - Processus condylaris in posterior view orientation horizontal (0); medial end lower than lateral end  (1).
  4. Mandibula - Ratio: length of symphysis TO total length of corpus mandibulae 15 % or less (0); >15 % (1).
  5. Mandibula - Ratio: distance from dorsal end of processus coronoideus to dorsal end of processus condylaris TO total height of ramus mandibulae 35 % and less (0); >35 % (1).
  6. Mandibula - morphology of processus coronoideus slender and/or curving posteriad (0); broad, straight, upright (1).
  7. Mandibula - morphology of angulus mandibulae indented, sometimes elongated (0); broad, wide, round (1); receding (2).
  8. Cranium - Ratio: facial part of the cranium TO total condylo-basal length of skull <56 % (0); 56-67 % (1); >67 % (2).
  9. Cranium - Ratio: nasal length TO palatal length <34 % (0); 34-42 % (1); 43-60 % (2); 61-70 % (3); >70 % (4).
  10. Cranium - Ratio: lacrimal length TO average diameter of orbita <91 % (0); 91-130 % (1); >130 % (2).
  11. Cranium - Ratio: distance between foramina palatina TO total palatal width (at position of for. pal.) <40 % (0); 40-50 % (1); 51-60 % (2); >60 % (3).
  12. Cranium - Ratio: bulla length TO bulla width <1.85 (0); 1.85-2.05 (1); >2.05 (2).
  13. Cranium - Cranium proportions in lateral view short, stocky, high (0); intermediate (1); long, low (2).
  14. Cranium - Ratio: area of preorbital vacuity TO area of cranium (l*w(pov)/l*w(skull)) <0.005 (0); 0.005-0.015 (1); >0.015 (2).
  15. Cranium - Ratio OHB (sub Protuberantia) TO OHO low, <60 % (0); intermediate, 60 - 80 % (1); high, > 80 % (2).
  16. Cranium - Ratio: length lacrimal TO height lacrimal >1 (=anteroposterior > dorsoventral) (0); <1 (=anteroposterior < dorsoventral) (1); =1 +-0.05 (2).
  17. Cranium - Ratio: distance between ventral cristae on maxilla TO total width of maxilla (at the same position) close together, <75 % (0); further apart, >/=75 % (1).
  18. Cranium - Ratio: pedicle diameter TO average pedicle length <40 % (0); 40 - 175 % (1); >175 % (2).
  19. Cranium - Ratio: Width of cranium across orbitae TO width of braincase </= 120 % (0); 121-135 % (1); 136-160 % (2); >/= 161 % (3).
  20. Cranium - Processus nasalis of praemaxilla short, ends in anterior half of diastema (0); intermediate, ends in posterior part of diastema (1); long, extending to praemolars, sometimes overlapping with P2-P3 (2).
  21. Cranium - praemaxilla and nasal not in contact (0); in contact (1).
  22. Cranium - Processi rostralis of nasal, dorsal view medial process short, lateral process long (0); medial process long, lateral process short (1); both processi of same length (2).
  23. Cranium - anterior end of nasal dorsal to C or further anterior (0); dorsal to diastema (1); dorsal to P2 or further posterior (2).
  24. Cranium - Anterior extension of nasals in relation to posterior extension of praemaxilla nasal extends more anterior than posterior end of praemaxilla (0); anterior end of nasal approximately at same level as posterior end of praemaxilla (1); nasal end is more posterior to the posterior end of praemaxilla (2).
  25. Cranium - Ratio: nasal length TO nasal width <100 % (0); 150-250 % (1); > 250 % (2).
  26. Cranium - Orientation of the lateral sutures of the nasals in relation to sagittal plane parallel or subparallel (0); diverging posteriorly (1).
  27. Cranium - Contact between nasals and maxilla, praemaxilla & lacrimal no suture (0); suture (1).
  28. Cranium - posterior extension of nasals little; P2-P3 (0); moderate; P3-P4 (1); strong; M1 & further posterior (2).
  29. Cranium - Crista facialis on maxillary absent (0); weak, but visible (1); strong, can be delimited by prominent crest (2).
  30. Cranium - Extension of the lateral edge of the orbita absent - weak (close to skull) (0); strong (clear protrusion) (1).
  31. Cranium - Orientation and morphology of linae temporalis on the parietal converging considerably posteriorly (0); converging only slightly, rather parallel along most of the braincase (1); converging considerably forming a crista sagittalis (2).
  32. Cranium - morphology of preorbital vacuity trapezoid (0); parallelogram (1); triangular (2); two or more round edges (3).
  33. Cranium - Preorbital fossa (lacrimal pit) absent (0); present (at least in males) (1); present & very deep including sharp edge on dorsal part of lacrimal (2).
  34. Cranium - Morphology of orbita round (0); 1 straight rim (1); 2 or more straight rims (2).
  35. Cranium - Processus lacrimalis absent or weak (0); present & prominent (1).
  36. Cranium - position of lacrimal foramina inside orbit (0); on orbit rim (1); outside orbit rim (on facial part of lacrimal) (2).
  37. Cranium - Relative position of foramen lacrimalis superior to f. l. inferior in level with each other (0); offset (1).
  38. Cranium - Position of infraorbital foramen anterior to P2 (0); dorsal to P2/3 (1); dorsal to P4 or further posterior  (2).
  39. Cranium - Position of the posterior end of the tooth row (teeth oriented horizontally) ventral to anterior half of orbit or further anterior (0); ventral to posterior half of orbit or further posterior (1).
  40. Cranium - Orientation of occiput in lateral view perpendicular (0); inclined, basicranial end more posterior than supraoccipital end (1); inclined, basicranial end more anterior than supraoccipital end (2).
  41. Cranium - Tuber maxillae (posterior to molars) weak or absent (0); prominent & protruding (1).
  42. Cranium - Contact of lacrimal and frontal  external suture (0); internal suture, blunt contact between the two bones (1).
  43. Cranium - Parietal-occipital suture rounded or square (0); two-humped (1).
  44. Cranium - Process on posterior end of fossa mandibularis continuous (0); not continuous (e. g. more prominent on posteromedial side) (1).
  45. Cranium - Orientation of anterior rim of the fossa mandibularis perpendicular to sagittal plane or slightly concave (0); transverse, lateral part much more posterior (1).
  46. Cranium - Position of palatine foramina at level of M1 (0); at level of M1-M2 (1); at level of M2 or further posterior (2).
  47. Cranium - Morphology of praemaxila in ventral view lateral rims of praemaxilla almost parallel, snout tip slightly tapering (0); lateral rims of praemaxilla tapering considerably (1); lateral rims of praemaxilla broadening towards snout tip or square shaped (2).
  48. Cranium - Snout tip with two mediad directed small processi absent (0); present (1).
  49. Cranium - "median indent" of palate ends at M3 or further posterior (0); extends to M2 or further anterior (1).
  50. Cranium - Morphology of "median indent" on palate rounded, parabolic - U-shaped (0); more acute, V-shaped (1); parabolic with prominent spina nasalis caudalis (2).
  51. Cranium - Relative position of "medial indent" to lateral "indents" on palatal medial "indent" clearly more posterior than lateral "indents" (0); all three on the same level or slightly more anterior/posterior (1); medial "indent" clearly more anterior than lateral "indents" (2).
  52. Cranium - Process of alisphenoid (anterior to foramen ovale) barely developed or absent (0); very prominent (1).
  53. Cranium - Morphology of the foramen ovale very small (more rounded) (0); relatively big & oval (1).
  54. Cranium - basioccipital tuberosities absent or very weak (0); prominent (1).
  55. Cranium - Morphology of the basioccipital in males short & wide, quadrangular or triangular outline (0); elongated, longer than wide (1).
  56. Cranium - fossa between anterior tuberosities (in males) absent or shallow & wide (0); clearly present & narrow (not to be confused with presence of two big anterior tuberosities) (1).
  57. Cranium - Posterior basioccipital tuberosities (in males) absent or weak (0); prominent & voluminuous (1).
  58. Cranium - Longitudinal crests between the anterior & posterior basioccipital tuberosities (in males) absent or weak (0); prominent (1).
  59. Cranium - Morphology of processus condylaris relatively broad, sometimes triangular (0); very narrow & thin (1).
  60. Cranium - exposure of the processus mastoideus of the petrosal majority of mastoid process exposed laterally  (0); majority of mastoid process exposed occipitally (1); proportions of mastoid process exposed equally in lateral & occipital view (2).
  61. Cranium - Processus mastoideus & parietal in dorsal view far apart, never in contact (0); relatively close sometimes in contact (1); very close usually in contact (2).
  62. Cranium - Ventral inflation of ectotympanic bulla absent, ventral edge of bulla dorsal to ventral edge of condyles occipitalis (0); moderate, ventral edge of bulla at same level as ventral edge of condyles occipitalis (1).
  63. Cranium - Morphology of bulla in lateral view convex, half circle-shaped (0); flat & spiky (1).
  64. Cranium - Median process on bulla absent or weak (0); prominent (1).
  65. Cranium - Opening of meatus acusticus externus in ventral view directed laterad (0); directed posteriad (1).
  66. Cranium - Morphology of fissura palatina oval (0); not entirely oval (1).
  67. Cranium - Posterior extension of the processi palatinae on the praemaxilla ends +- with fissura palatina (0); extends fissura palatina a little posteriad (1); extends fissura palatina a much further posteriad (2).
  68. Cranium - Extension of the vomer posteriad to the inner choanes absent (0); present (1).
  69. Cranium - Extension of the os zygomaticum (between maxilla & lacrimal) extends to M1 (0); extends to P3/4 (1); extends to P2 or further anterior (2).
  70. Cranium - Facial crests as anterior extension of the pedicles absent (0); present (1).
  71. Cranium - bony bar posterior to fossa mandibula (only visible without in situ bulla) closed (0); open (1).
  72. Cranium - Postcornual fossa absent or weak (0); present & definite (1).
  73. Antlers - Antlers in females absent (0); present (1).
  74. Antlers - Morphology of adult antlers < three tines (0); exactly three tines (1); > three tines, complex (2).
  75. Antlers - Antler position/origination in lateral view antler base directly dorsal to orbit (0); antler base posterior to orbit (1); antler base far posterior to orbit (2).
  76. Antlers - Pedicle position in frontal view pedicles very close together (entirely over braincase) (0); pedicles at same distance between midline and lateral borders of the skull/orbit (partially over braincase) (1); pedicles far apart (mostly or entirely outside braincase) (2).
  77. Antlers - Inclination of pedicle to horizontal plane upright, > 60"° (0); inclined, 41-60"° (1); extremely inclined, < 40"° (2).
  78. Antlers - cross section of pedicles ("˜med-lat/"˜ant-post) mediolaterally compressed (< 0.9) (0); round (0.9-1-1) (1); anteroposteriorly compressed (> 1.1) (2).
  79. Antlers - Ratio: adult antler length TO total skull length very short, "‰¤ 75 % (0); short, 76-120 % (1); intermediate, 121-175 % (2); long, 176-240 % (3); very long, > 240 % (4).
  80. Antlers - Burr absent (0); present (1).
  81. Antlers - Back tine absent (0); present (1).
  82. Antlers - Bez tine absent (0); present (1).
  83. Antlers - Middle tine absent (0); present (1).
  84. Pedicles in dorsal view +/- parallel (0); divergent (1).
  85. Antlers - development of antler shaft broad antler base base, no shaft (0); small antler base, bifurcation close to burr (1); small antler base, bifurcation far from burr, long shaft (2).
  86. Antlers - angle between 'brow tine' and main beam < 90"° (0); > 90"° (1).
  87. Antlers - origination of pedicles in lateral view directly above orbita (0); well behind orbita (1).
  88. Antlers - Ratio: adult antler length/average pedicle length < 5 (0); 5 - 15 (1); 16 - 30 (2); > 30 (3).
  89. Antlers - Palmation of antlers absent (0); present (1).
